# Supplementary material
Source: PubMed Central journal article supplement (PMC3593694)
Supplement: Supp_Fig1.pdf [file Supp_Fig1.pdf]

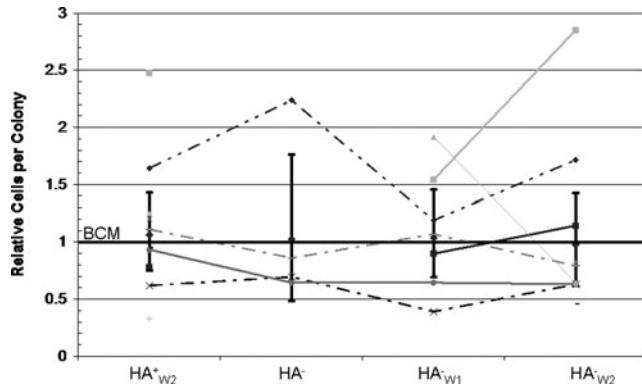

**SUPPLEMENTARY FIG. S1.** Colony metrics obtained using Colonyze™ software analysis. The number of cells per colony, a metric of proliferation, for each fraction after magnetic separation (MS) processing is standardized to the buffy-coated marrow (BCM). Geometric means (diamonds) and 95% confidence intervals are presented along with data from each subject (lines).
