# Supplementary material
Source: PubMed Central journal article supplement (PMC3593694)
Supplement: Supp_Fig2.pdf [file Supp_Fig2.pdf]

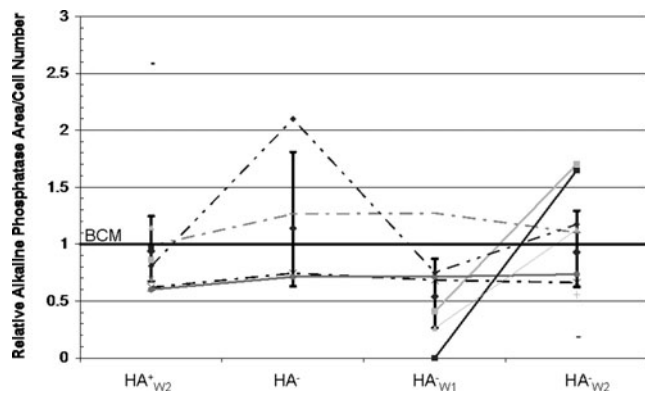

**SUPPLEMENTARY FIG. S2.** Colony metrics obtained using Colonyze software analysis. The area fraction of alkaline phosphatase (AP) per cell number, a metric of osteoblastic differentiation, for each fraction after MS processing is standardized to the BCM. Geometric means (diamonds) and 95% confidence intervals are presented along with data from each subject (lines).
