# Supplementary material
Source: PubMed Central journal article supplement (PMC3593694)
Supplement: Supp_Fig3.pdf [file Supp_Fig3.pdf]

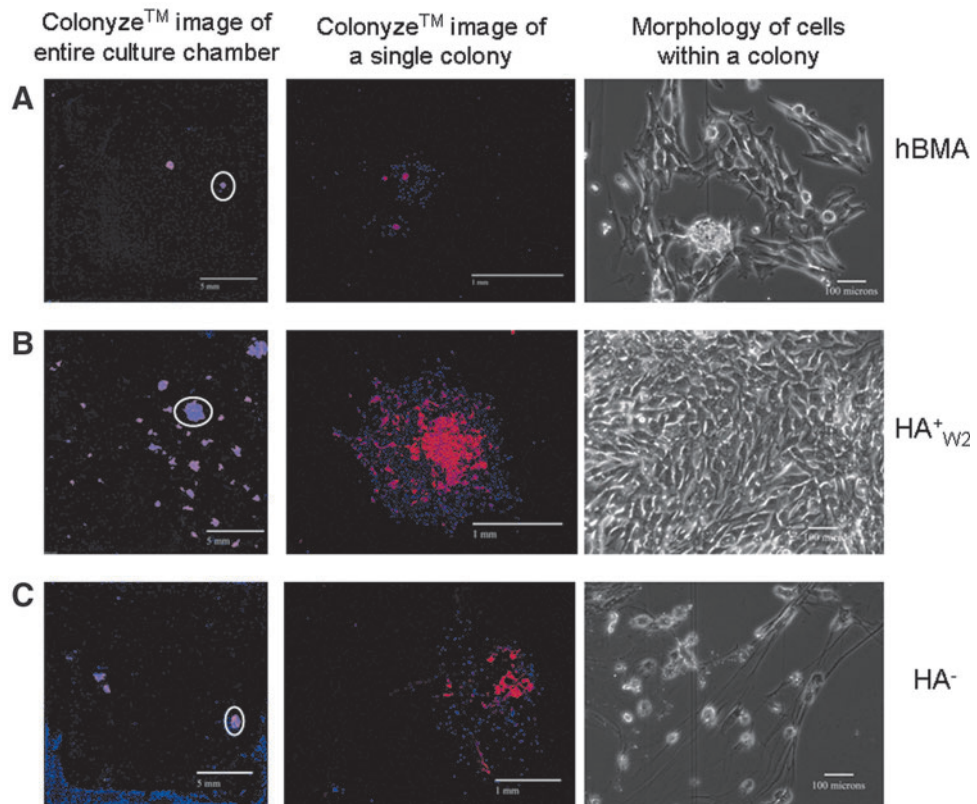

**SUPPLEMENTARY FIG. S3.** Images illustrating the morphology of cells within colonies formed by heparinized bone marrow aspirate (hBMA) (**A**), HA<sup>+</sup><sub>w2</sub> fraction (**B**), and the HA<sup>-</sup> fraction (**C**). The first column illustrates a single culture chamber as viewed through the Colonyze interface with nuclei (DAPI staining, blue) and colony (light pink) masks active. The middle column shows a closer view of a single colony in the Colonyze interface with the nuclei (DAPI staining, blue) and AP (magenta) masks active. The last column is a 10× magnification illustrating cell morphology using phase-contrast microscopy.
